# Supplementary material
Source: MDPI journal article supplement (https://www.mdpi.com/2072-4292/12/24/4011)
Supplement: s1 [file s1]

# **Comment on “Pre-Collapse Space Geodetic Observations of Critical Infrastructure: The Morandi Bridge, Genoa, Italy” by Milillo et al. (2019)**

**Riccardo Lanari <sup>1,\*</sup>, Diego Reale <sup>1</sup>, Manuela Bonano <sup>1,2</sup>, Simona Verde <sup>1</sup>, Yasir Muhammad <sup>1,3</sup>, Gianfranco Fornaro <sup>1</sup>, Francesco Casu <sup>1</sup> and Michele Manunta <sup>1</sup>**

<sup>1</sup> Institute for the Electromagnetic Sensing of the Environment—National Research Council (IREA-CNR), Via Diocleziano 328, 80124 Naples, Italy; reale.d@irea.cnr.it (D.R.); bonano.m@irea.cnr.it (M.B.); verde.s@irea.cnr.it (S.V.); yasir.m@irea.cnr.it (Y.M.); fornaro.g@irea.cnr.it (G.F.); casu.f@irea.cnr.it (F.C.); manunta.m@irea.cnr.it (M.M.)

<sup>2</sup> Institute of Methodologies for Environmental Analysis—National Research Council (IMAA-CNR), C.da S. Loja – Z.I., 85050 Tito Scalo (PZ), Italy

<sup>3</sup> Department of Engineering—University of Naples “Parthenope”, Centro Direzionale Isola C4, 80133 Naples, Italy

\* Correspondence: lanari.r@irea.cnr.it

## **S1. Analysis at Ground Level**

In order to further provide information about possible precursor, our displacement study also includes the analysis of the detected pixels located at the ground level in correspondence of the collapsed tower. The map of the detected PSs, and the plots of the corresponding estimated deformation times series are provided in Figure S1 and Figure S2. These results further confirm that no significant displacements were detected.

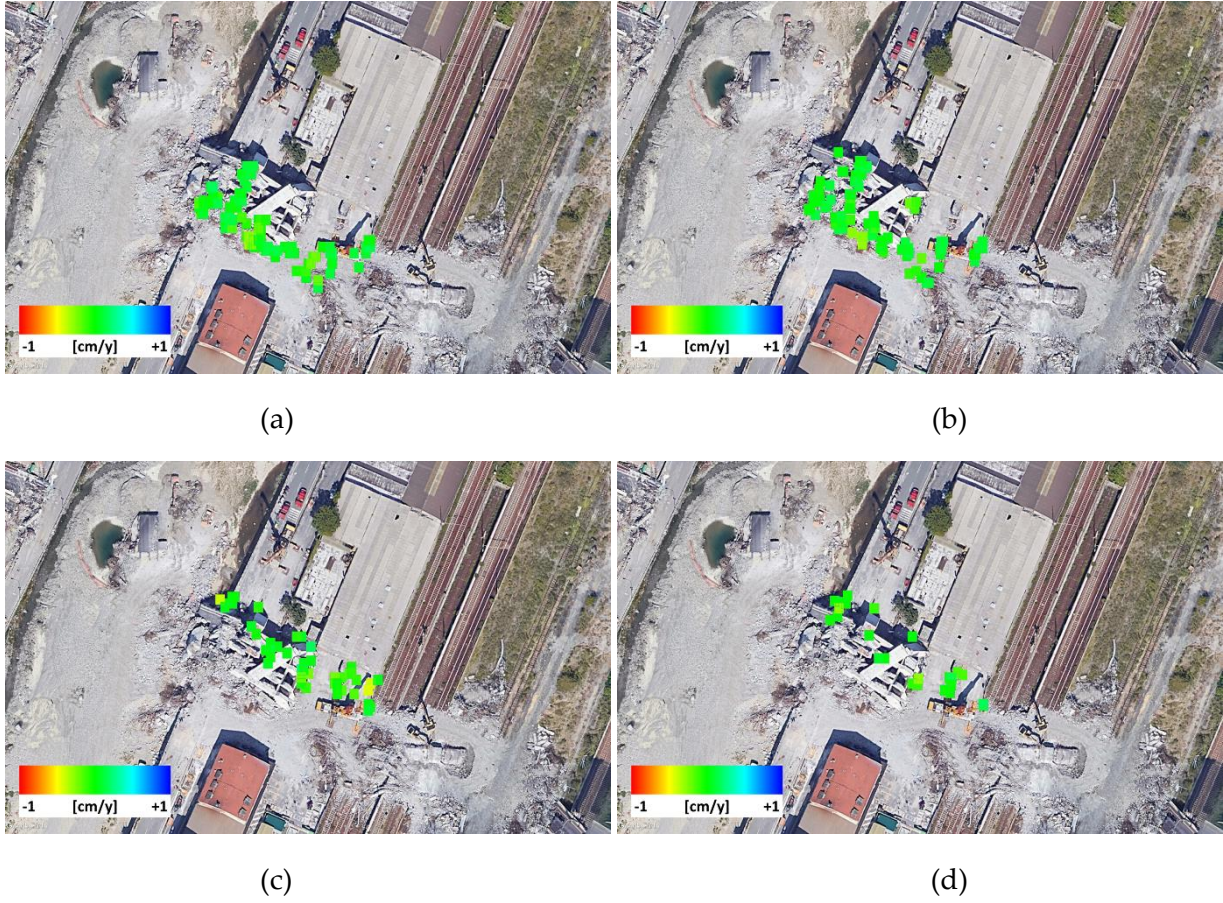

**Figure S1.** Deformation mean velocity for the measurement points located at the ground level in correspondence to the area of interest of the collapsed pillar, (a) SBAS and (b) TomoSAR processing over the ascending dataset, (c) SBAS and (d) TomoSAR processing over the descending dataset.

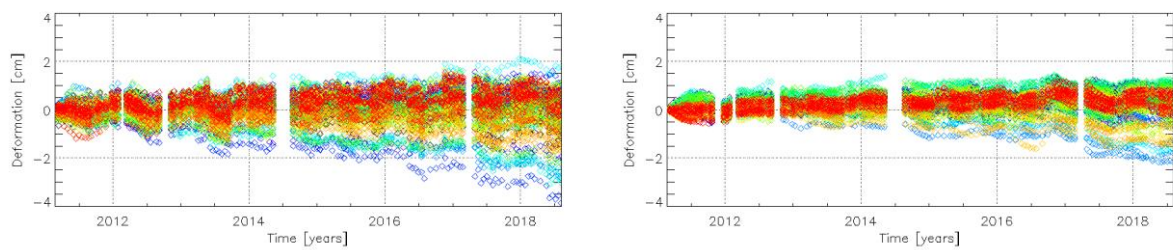

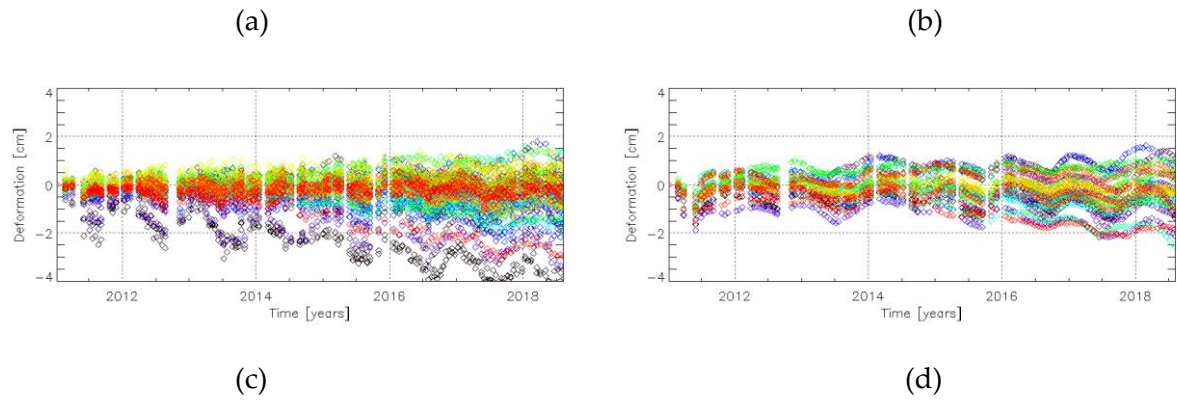

**Figure S2.** Plots of the estimated deformation time series for the measurement points at the ground level in correspondence to the area of interest of the collapsed pillar provided in Figure S1 for (a) SBAS and (b) TomoSAR processing over the ascending dataset, (c) SBAS and (d) TomoSAR processing over the descending dataset.
